# Supplementary material
Source: Springer Nature journal article supplement (https://www.springermedizin.de/resource/supplementary/13024_2011_214_MOESM4_ESM.pdf/9643688)

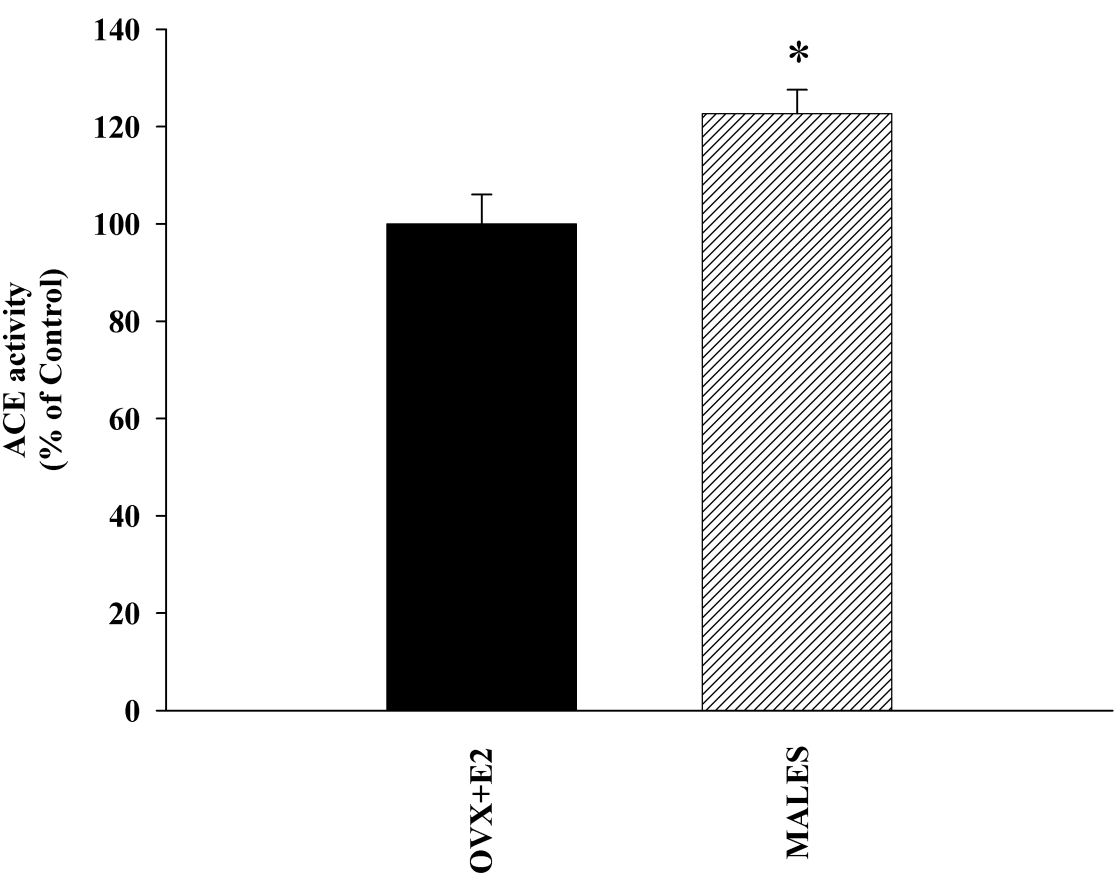

Supplement: MOESM4 [file 9643688]
